# Supplementary material for: Aromatic–aromatic interactions between residues in KCa3.1 pore helix and S5 transmembrane segment control the channel gating process
Source: PubMed Central journal article supplement — J Gen Physiol. 2014 Feb;143(2):289–307. doi: 10.1085/jgp.201311097 (PMC4001770; doi:10.1085/jgp.201311097), 2014-02
Supplement: supp_jgp.201311097_JGP_201311097_sm.pdf [file supp_jgp.201311097_JGP_201311097_sm.pdf]

Garneau et al., <http://www.jgp.org/cgi/content/full/jgp.201311097/DC1>

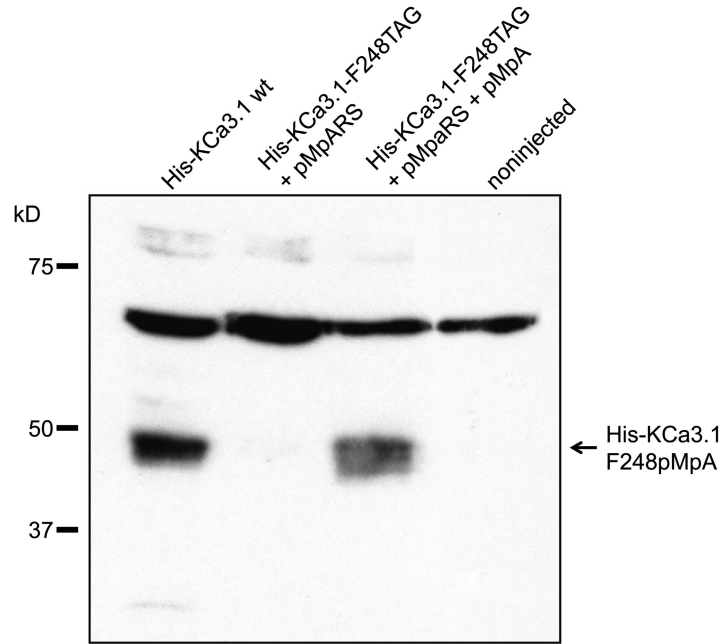

**Figure S1.** Amber suppression of *Bst*RNA-*Ec*TyrRS. Western blot analysis of full-length expression of a His-KCa3.1 channel tagged with 6-His at position 132 of the channel: lane 1, His-KCa3.1 wild type; lane 2, His-KCa3.1-F248TAG mutant plus pU6-pMpA plasmid; lane 3, His-KCa3.1-F248TAG plus pU6-pMpA plasmid in oocytes injected with 5 mM of cytoplasmic pMpA; lane 4, noninjected oocytes. Full-length expression of His-KCa3.1-F248TAG is suppressed by *Ec*TyrRS together with *Bst*RNA in the presence of pMpA. A 40- $\mu$ g aliquot of the cell lysate for each reaction was analyzed with anti-His-HRP. A nonspecific protein of 70 kD also reacted with the anti-His-HRP antibody.

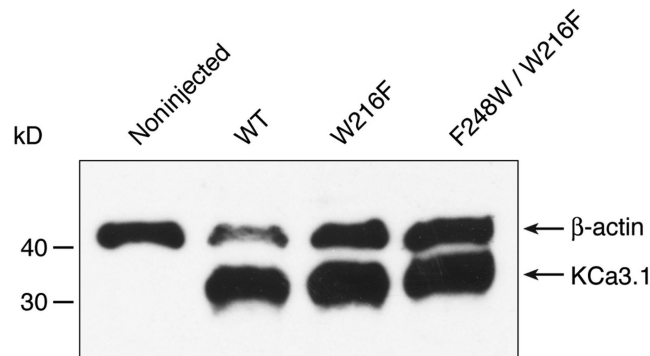

**Figure S2.** Western blot analysis confirming expression of W216F and F248W-W216F KCa3.1 mutants in *Xenopus* oocytes. Membranes from noninjected oocytes (lane 1), KCa3.1 wild type (lane 2), W216F KCa3.1 (lane 3), and F248W-W216F KCa3.1 (lane 4) were obtained and processed as described previously (Morales et al. 2013. *J. Gen. Physiol.* 142:37-60). A 10- $\mu$ g aliquot of the cell lysate for each reaction was sequentially analyzed using rabbit anti-KCa3.1 (ab75956 1:2,000; Abcam) or mouse anti- $\beta$ -actin antibodies (ab 1:10,000; Abcam), followed by hybridization with HRP-conjugated goat anti-rabbit or goat anti-mouse IgG at 1:25,000 dilutions (Jackson ImmunoResearch Laboratories) and detected using the ECL plus chemiluminescence kit (GE Healthcare). A  $\approx$ 35-kD band was obtained for KCa3.1 wild-type and KCa3.1 mutants as well as for confirming channel expression in the absence of functional activity (F248W-W216F). 42 kD  $\beta$ -actin was taken as control.

### A Wild type

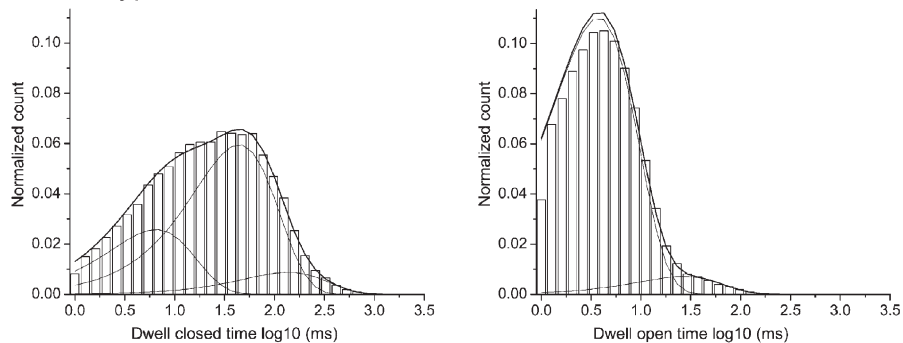

### B F248A

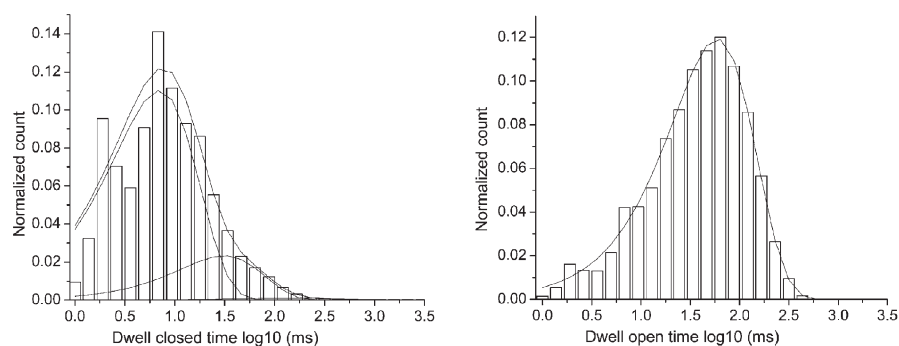

### C F248W

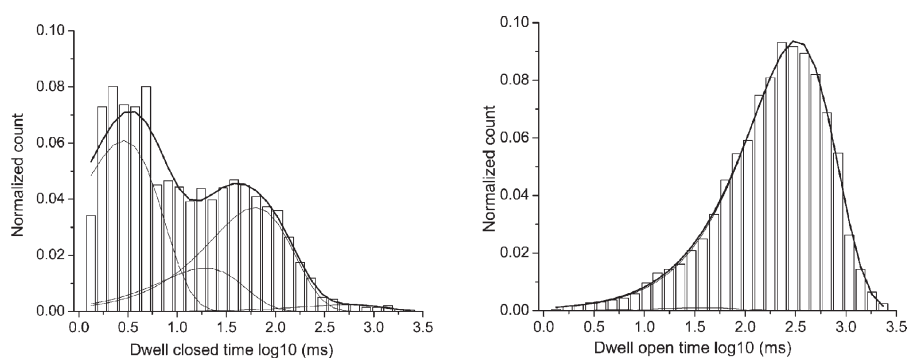

**Figure S3.** Open and closed dwell-time distributions computed for the wild-type (F248; A), F248A (B), and F248W (C) KCa3.1 mutant channels. Closed times could be fitted to a four closed-state distribution with respective values of 4.5 ms (1.7%), 6.8 ms (39%), 30 ms (53%), and 235 ms (6.3%) for the wild-type channel; 6 ms (79%), 26 ms (19%), 117 ms (1%), and 910 ms (1%) for the F248A mutant; and 3 ms (43%), 17 ms (15%), 54 ms (38%), and 475 ms (2%) for the F248W channel. Except for the F248A mutant, where the open state could be fitted to a single-state model with a mean value of 50 ms, the wild-type and F248W channels were best fitted by a two open-state distribution with respective values of 7 ms (89%) and 49 ms (11%) for the wild type channel, and 33 ms (1%) and 285 ms (99%) for the F248W mutant. Distributions were computed using the QUB package.
